# Supplementary material for: Is Olfactory Testing a Useful Diagnostic Tool to Identify SARS-CoV-2 Infections Early? A Cross-Sectional and Longitudinal Analysis
Source: MDPI journal article supplement (doi:10.3390/jcm12093162), 2023-04-27
Supplement: s1 [file s1]

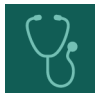

## SUPPLEMENTARY MATERIALS

### Patients

At enrollment, all participants of both study parts completed questionnaires assessing basic demographic, clinical and epidemiological information. In the longitudinal study part, participants, who were tested positive for a SARS-CoV-2 infection, daily evaluated general clinical (such as fever, headache, etc.) and ear, nose and throat (ENT) symptoms since the disease onset in a personnel questionnaire with a five-point scale (0 = no symptoms; 3 = severe symptoms). A parent of legal guardian assisted in completing questionnaires for children <18 years of age.

Severity of the clinical symptoms was assessed subjectively by a questionnaire. Classification into the individual severity levels was carried out in accordance to NIH guidelines in a slightly modified form [1]:

*Asymptomatic course of disease:* Individuals, who were tested positive for SARS-CoV-2 using a virologic test (i.e., a nucleic acid amplification test [NAAT] or an antigen test) but who have no symptoms that are consistent with COVID-19.

*Mild course of disease:* Individuals who have any of the various signs and symptoms of COVID-19 (e.g., fever, cough, sore throat, malaise, headache, muscle pain, nausea, vomiting, diarrhea, loss of taste and smell) but who do not have shortness of breath, dyspnea, or abnormal chest imaging.

*Moderate course of disease:* Individuals who show evidence of lower respiratory disease during clinical assessment or imaging and who have an oxygen saturation measured by pulse oximetry ( $\text{SpO}_2$ )  $\geq 94\%$  on room air at sea level.

*Severe course of disease:* Individuals who show evidence of lower respiratory disease (with an oxygen saturation measured by pulse oximetry ( $\text{SpO}_2$ )  $\geq 94\%$ ) and a pronounced expression of further clinical symptoms (fever, cough, sore throat, malaise, headache, muscle pain, nausea, vomiting, diarrhea, loss of taste and smell).

### Olfactory Function Assessment

Accordingly, a test was considered positive for relevant OD if at least two test results were incorrect. Severity of OD was determined based on the quantitative test results: grade 0 = five or four correct test results and no OD; grade 1: three correct test results, mild OD; grade 2 = two correct test results, moderate OD; grade 3 = one correct result, severe OD; grade 4 = no correct test result, anosmia. Hyposmia was defined as mild to severe OD (grade 1–3), while anosmia was characterized by complete loss of smell (grade 4). Each card contained a different composition of odors in order to avoid falsification of results due to repetitive performance of the test.

**Table S1.** Univariate and multivariate analysis of factors associated with olfactory dysfunction ( $n = 494$ ).

|                                         | OD ( $n = 226$ ) | Univariate<br>$p$ value | Multivariate<br>OR (95% CI) | $p$ value |
|-----------------------------------------|------------------|-------------------------|-----------------------------|-----------|
| Gender, $n$ (%)                         |                  |                         |                             | <0.001    |
| Males                                   | 158/307 (51.5)   | <0.001                  | 2.44 (1.58–3.77)            |           |
| Females                                 | 67/187 (35.8)    |                         |                             |           |
| Age (years)                             | 67 (16–94)       | <0.001                  | 0.95 (0.94–0.97)            | 0.001     |
| Current smoking, $n$ (%)                | 41/46 (89.1)     | 0.74                    |                             |           |
| Comorbidities                           |                  |                         |                             |           |
| Diabetes mellitus, $n$ (%)              | 52/101 (51.5)    | 0.21                    |                             |           |
| Pulmonary diseases, $n$ (%)             | 33/53 (62.3)     | 0.02                    |                             |           |
| Cardiovascular diseases, $n$ (%)        | 54 (10–538)      | <0.001                  |                             |           |
| Malignancy, $n$ (%)                     | 57/126 (45.2)    | 0.85                    | 1.65 (0.83–3.28)            | 0.15      |
| Renal diseases, $n$ (%)                 | 33/69 (47.8)     | 0.74                    | 1.15 (0.74–1.80)            | 0.53      |
| Hepatological diseases, $n$ (%)         | 21/53 (39.6)     | 0.20                    |                             |           |
| Preoperations in the ENT tract, $n$ (%) | 1/3 (33.3)       | 0.66                    |                             |           |

Abbreviations: ENT, ear nose throat; OD, olfactory disease.

**Table S2.** Sub-analysis of factors associated with olfactory dysfunction in patients infected with the SARS-CoV-2 Delta variant ( $n = 42$ ).

| Characteristics                                   | Olfactory Dysfunction ( $n = 33$ ) | No Olfactory Dysfunction ( $n = 9$ ) | $p$ value |
|---------------------------------------------------|------------------------------------|--------------------------------------|-----------|
| Males, $n$ (%)                                    | 15 (45.5)                          | 7 (77.8)                             | 0.04      |
| Age (years), median (range)                       | 34 (12–59)                         | 36 (12–47)                           | 0.09      |
| Current smoking, $n$ (%)                          | 12 (36.4)                          | 0 (0)                                | 0.03      |
| General symptoms                                  |                                    |                                      |           |
| Fever, $n$ (%)                                    | 6 (18.2)                           | 0 (0)                                | 0.32      |
| Fatigue, $n$ (%)                                  | 11 (33.3)                          | 2 (22.2)                             | 1.00      |
| Arthralgia, $n$ (%)                               | 4 (12.1)                           | 0 (0)                                | 0.57      |
| ENT                                               |                                    |                                      |           |
| Sore throat, $n$ (%)                              | 7 (21.2)                           | 1 (11.1)                             | 1.00      |
| Nasal obstruction, $n$ (%)                        | 16 (48.5)                          | 2 (22.2)                             | 0.43      |
| Rhinorrhea, $n$ (%)                               | 16 (48.5)                          | 2 (22.2)                             | 0.69      |
| Pneumological                                     |                                    |                                      |           |
| Cough, $n$ (%)                                    | 17 (51.5)                          | 2 (22.2)                             | 0.70      |
| Shortness of breath, $n$ (%)                      | 1 (3.0)                            | 0 (0)                                | 1.00      |
| Digestive                                         |                                    |                                      |           |
| GI symptoms (nausea, vomiting, diarrhea), $n$ (%) | 0 (0)                              | 1 (0)                                | 1.00      |
| Neurological                                      |                                    |                                      |           |
| Taste disorders                                   | 1 (3.0)                            | 1 (11.1)                             | 0.36      |
| Headache                                          | 10 (0)                             | 1 (11.1)                             | 0.41      |

**Table S3.** Sub-analysis of factors associated with olfactory dysfunction in patients infected with the SARS-CoV-2 Omicron variant ( $n = 48$ ).

| Characteristics                   | Olfactory Dysfunction ( $n = 27$ ) | No Olfactory Dysfunction ( $n = 21$ ) | $p$ value |
|-----------------------------------|------------------------------------|---------------------------------------|-----------|
| Males, $n$ (%)                    | 15 (55.6)                          | 4 (14.2)                              | 0.03      |
| Age (years), median (range)       | 30 (112–65)                        | 25 (12–58)                            | 0.09      |
| Positive smoking history, $n$ (%) | 8 (29.6)                           | 2 (9.5)                               | 0.04      |
| General symptoms                  |                                    |                                       |           |
| Fever, $n$ (%)                    | 2 (7.4)                            | 1 (3.7)                               | 1.00      |
| Fatigue, $n$ (%)                  | 7 (25.9)                           | 3 (14.3)                              | 0.49      |
| Myalgia or arthralgia, $n$ (%)    | 7 (25.9)                           | 1 (3.7)                               | 0.12      |
| Loss of appetite, $n$ (%)         | 0 (0)                              | 0 (0)                                 |           |
| ENT                               |                                    |                                       |           |
| Sore throat, $n$ (%)              | 5 (18.5)                           | 0 (0)                                 | 0.06      |
| Nasal obstruction, $n$ (%)        | 21 (77.8)                          | 11 (52.4)                             | 0.20      |
| Rhinorrhea, $n$ (%)               | 21 (77.8)                          | 11 (52.4)                             | 0.20      |
| Pneumological                     |                                    |                                       |           |
| Cough, $n$ (%)                    | 16 (59.3)                          | 8 (38.0)                              | 0.23      |
| Shortness of breath, $n$ (%)      | 0 (0)                              | 0 (0)                                 |           |
| Digestive                         |                                    |                                       |           |
| GI symptoms, $n$ (%)              | 0 (0)                              | 0 (0)                                 |           |
| Neurological                      |                                    |                                       |           |
| Taste disorders, $n$ (%)          | 1 (3.7)                            | 0 (0)                                 | 1.00      |
| Headache, $n$ (%)                 | 9 (33.3)                           | 7 (4.8)                               | 1.00      |

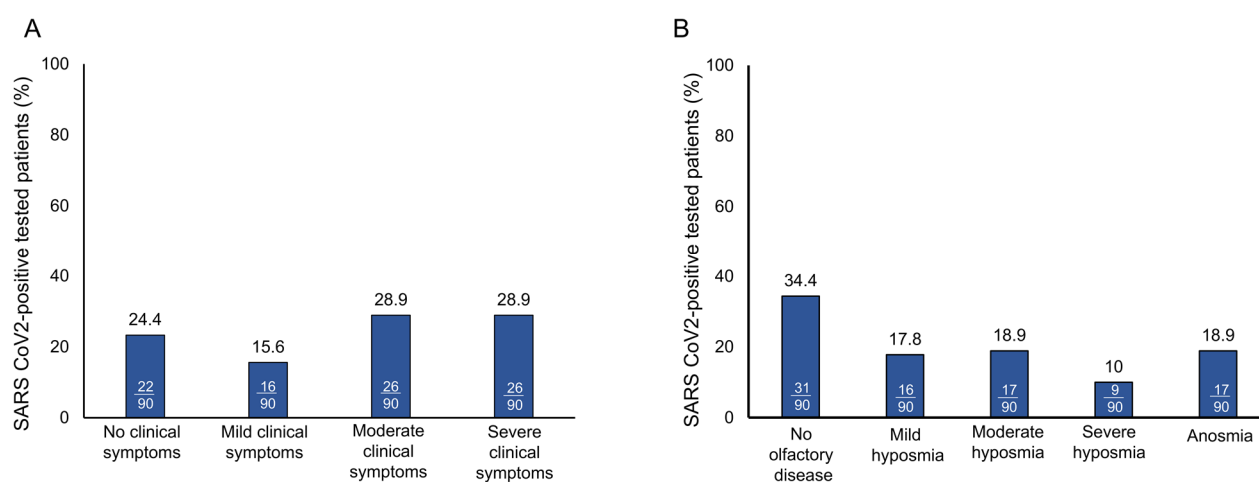**Figure S1.** Intensity of clinical symptoms during SARS-CoV-2 infection. Intensity of (A) classical clinical symptoms and of (B) olfactory dysfunction in SARS-CoV-2 positive tested individuals.

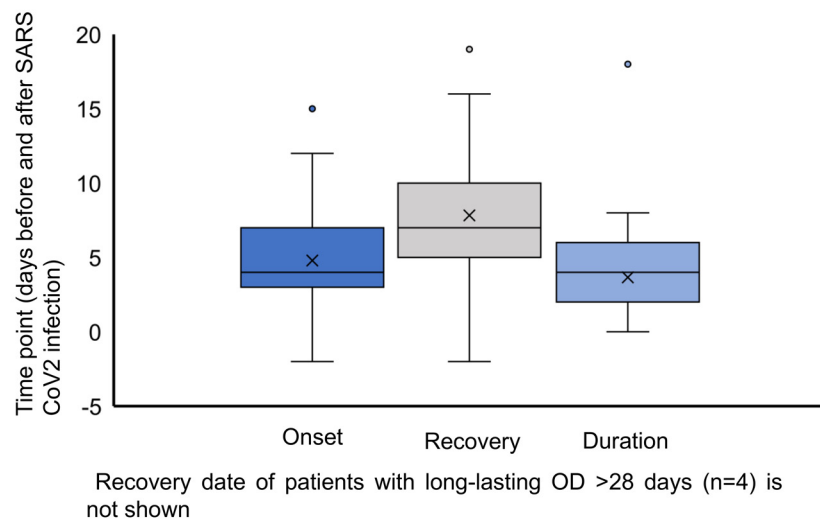

**Figure S2. Clinical course of clinical symptoms during SARS-CoV-2 infection.** Onset, duration and recovery of olfactory dysfunction in SARS-CoV-2 positive tested individuals.

## References

1. Clinical Spectrum. Available online: <https://www.covid19treatmentguidelines.nih.gov/overview/clinical-spectrum/> (accessed 26 February 2023).
